# Supplementary material for: Improving Dissolution and Cytotoxicity by Forming Multidrug Crystals
Source: PubMed Central journal article supplement (PMC7144552; doi:10.3390/molecules25061343), 2020-03-16
Supplement: molecules-25-01343-s001.pdf [file molecules-25-01343-s001.pdf]

## The supplemental files

**Table S1.** Crystal data and structure refinement for Rsg-Met.

|                                               |                                                                              |
|-----------------------------------------------|------------------------------------------------------------------------------|
| Empirical formula                             | C <sub>22</sub> H <sub>30</sub> N <sub>8</sub> O <sub>3</sub> S              |
| Formula weight                                | 486.60                                                                       |
| Crystal system                                | triclinic                                                                    |
| Space group                                   | P-1                                                                          |
| a/Å                                           | 6.9482                                                                       |
| b/Å                                           | 11.3147                                                                      |
| c/Å                                           | 11.3147                                                                      |
| α/°                                           | 72.375                                                                       |
| β/°                                           | 82.370                                                                       |
| γ/°                                           | 74.153                                                                       |
| Volume/Å <sup>3</sup>                         | 1240.82                                                                      |
| Z                                             | 2                                                                            |
| D <sub>calc</sub> g/cm <sup>3</sup>           | 1.302                                                                        |
| μ/mm <sup>-1</sup>                            | 1.493                                                                        |
| 2θ range for data collection/°                | 8.46 to 134.146                                                              |
| Reflections collected                         | 16699                                                                        |
| Independent reflections                       | 4433 [ <i>R</i> <sub>int</sub> = 0.0390, <i>R</i> <sub>sigma</sub> = 0.0305] |
| Data/restraints/parameters                    | 4433/18/334                                                                  |
| Goodness-of-fit on F <sup>2</sup>             | 1.026                                                                        |
| Final R indexes [ <i>I</i> > 2σ ( <i>I</i> )] | <i>R</i> <sub>1</sub> = 0.0523, <i>wR</i> <sub>2</sub> = 0.1428              |
| Final R indexes [all data]                    | <i>R</i> <sub>1</sub> = 0.0629, <i>wR</i> <sub>2</sub> = 0.1550              |
| Largest diff. peak/hole/e Å <sup>-3</sup>     | 0.43/-0.28                                                                   |
| CCDC no.                                      | 1962489                                                                      |

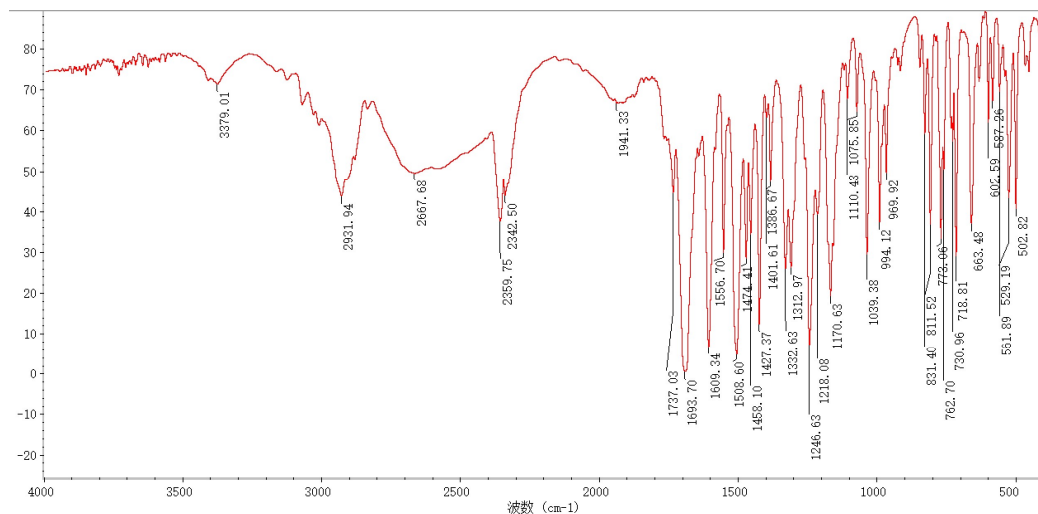

**Figure S1.** The FT-IR spectrum of Rsg

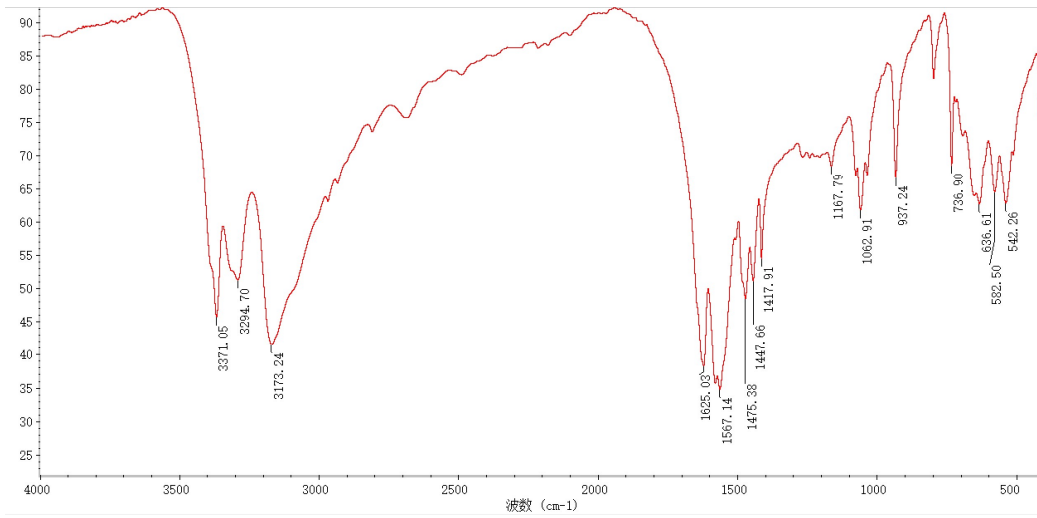

Figure S2. The FT-IR spectrum of Met

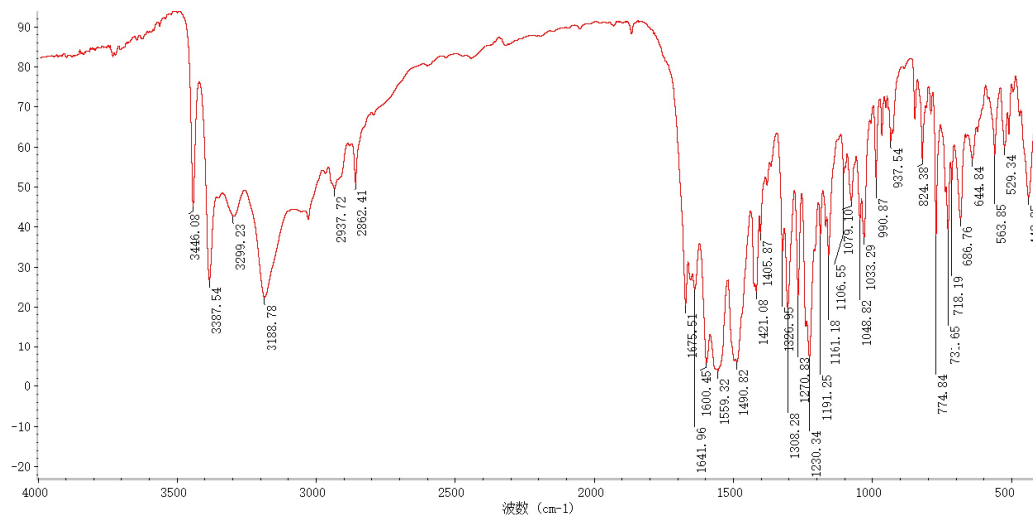

Figure S3. The FT-IR spectrum of Rsg-Met
